# Supplementary material for: Serious arrhythmia in initiators of citalopram, escitalopram, and other selective serotonin reuptake inhibitors: A population‐based cohort study in older adults
Source: PubMed Central journal article supplement — Clin Transl Sci. 2022 Jun 22;15(9):2105–15. doi: 10.1111/cts.13319 (PMC9468567; doi:10.1111/cts.13319), 2022-06-22
Supplement: CTS-15-2105-s001.pdf [file CTS-15-2105-s001.pdf]

Supplementary material to:

Serious arrhythmia in initiators of citalopram, escitalopram, and other selective serotonin reuptake inhibitors: A population-based cohort study in older adults

Mia Aakjær,<sup>1\*</sup> Sarah Kimmer Werther,<sup>1</sup> Marie Louise De Bruin,<sup>2,3</sup> Morten Andersen,<sup>1</sup>

<sup>1</sup>Pharmacovigilance Research Center, Department of Drug Design and Pharmacology, University of Copenhagen, Copenhagen, Denmark.

<sup>2</sup>Copenhagen Centre for Regulatory Science (CORS), Department of Pharmacy, University of Copenhagen, Copenhagen, Denmark.

<sup>3</sup>Utrecht Institute for Pharmaceutical Sciences (UIPS), Division of Pharmacoepidemiology and Clinical Pharmacology, Utrecht University, Utrecht, the Netherlands.

\*Corresponding author. Department of Drug Design and Pharmacology, University of Copenhagen, Jagtvej 160, DK-2100 Copenhagen, Denmark. Phone: +45 2711 2625. E-mail: mia.aakjaer@sund.ku.dk

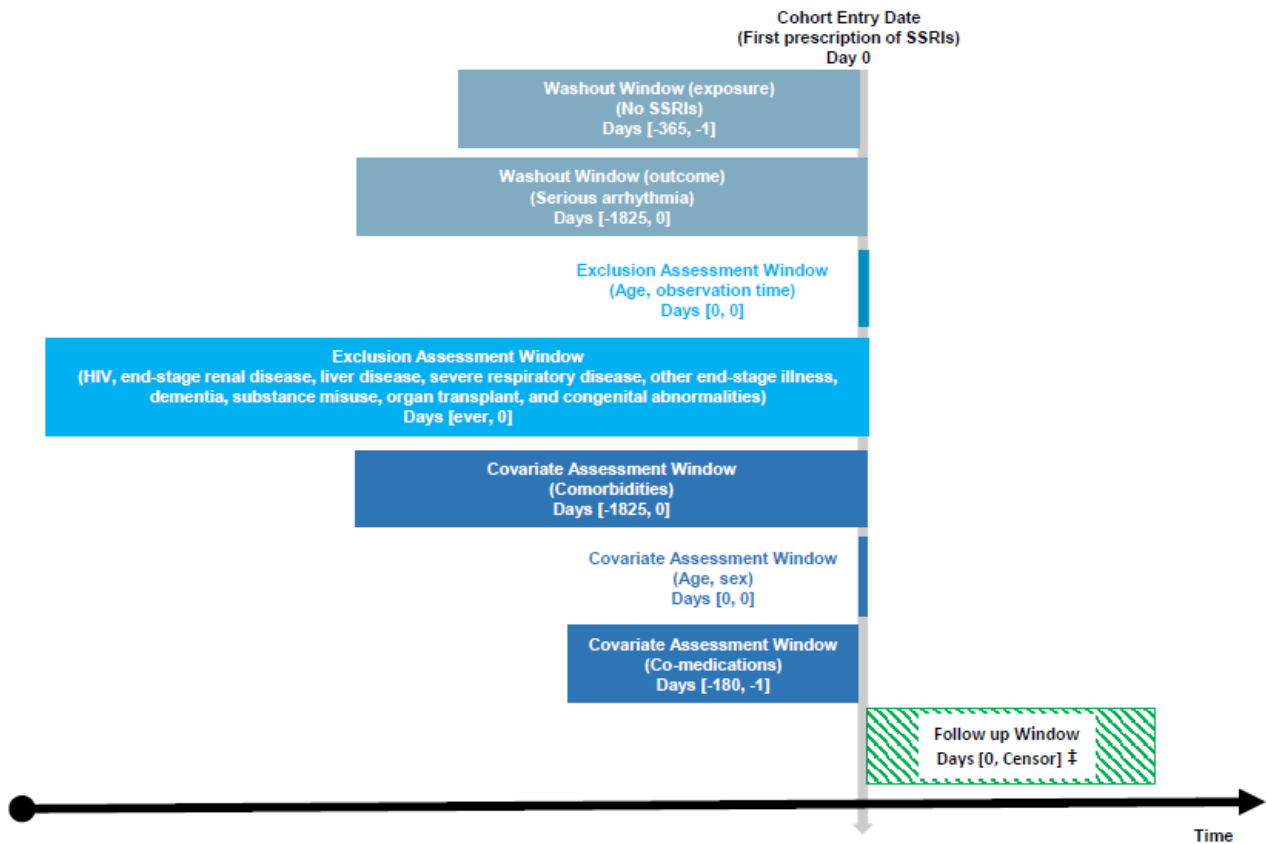

**Figure S1** Depiction of study design. Figure based on Schneeweiss *et al.*(1) Licensed under CC BY, can be found at <https://presc.sdu.dk/repeat-diagrams/>.

‡ Earliest of outcome of interest (serious arrhythmia), death, emigration, exclusion criterion, six months of follow-up, or end of study period.

HIV, human immunodeficiency virus; SSRIs, selective serotonin reuptake inhibitors

**Table S1** The emulated trial design compared to the hypothetical clinical trial

| Protocol component                                  | A hypothetical clinical trial                                                                                                                                                                                                                              | Target trial emulation (observational data)                                                                                                                                                                                                                                                                                                                                                     |
|-----------------------------------------------------|------------------------------------------------------------------------------------------------------------------------------------------------------------------------------------------------------------------------------------------------------------|-------------------------------------------------------------------------------------------------------------------------------------------------------------------------------------------------------------------------------------------------------------------------------------------------------------------------------------------------------------------------------------------------|
| Eligibility criteria                                | Participants aged 65 and above who did not meet the exclusion criteria. Enrollment continues until required sample size is achieved.                                                                                                                       | Individuals aged 65 and above who filled a prescription of a SSRI (a record in the Danish National Prescription Registry), who did not meet the exclusion criteria.                                                                                                                                                                                                                             |
| Washout window for the exposure                     | No use of SSRIs one year before enrollment.                                                                                                                                                                                                                | At least one year with no prescription of SSRIs before the index date.                                                                                                                                                                                                                                                                                                                          |
| Exclusion criteria                                  | Previous diagnosis of serious arrhythmia 5 years before the index date, history of HIV, end-stage renal diseases, liver diseases, severe respiratory diseases, other end-stage diseases, organ transplants, congenital abnormalities, or substance misuse. | Less than one year of observation time prior to the index date, more than one SSRI on the index date, previous diagnosis of serious arrhythmia 5 years before the index date, history of HIV, end-stage renal diseases, liver diseases, severe respiratory diseases, other end-stage diseases, organ transplants, congenital abnormalities, substance misuse at any time before the index date. |
| Treatment assignment/Exposure and comparator groups | Eligible participants are assigned randomly to either of the exposure groups or the comparator group and receive a defined daily dose until the end of the trial.                                                                                          | Eligible individuals are divided into three groups: two exposure groups and one active comparator group. The exposure groups were citalopram and escitalopram and the comparator group comprised of other SSRIs.                                                                                                                                                                                |
| Outcome                                             | Serious arrhythmia                                                                                                                                                                                                                                         | Serious arrhythmia                                                                                                                                                                                                                                                                                                                                                                              |
| Follow-up                                           | Intention-to-treat                                                                                                                                                                                                                                         | Intention-to-treat                                                                                                                                                                                                                                                                                                                                                                              |
| Censoring                                           | Participants are followed until the occurrence of the outcome (serious arrhythmia), loss to follow-up, death, end of follow-up, or end of study period, whatever happens first.                                                                            | Individuals are followed from the index date (fill of prescription) until the occurrence of the outcome (serious arrhythmia), emigration, death, end of follow-up, or end of study period, whatever happens first.                                                                                                                                                                              |

HIV, human immunodeficiency virus; SSRIs, selective serotonin reuptake inhibitors

**Table S2** Definitions and time windows for exposures, outcomes, exclusion criteria, and covariates

| Variable                                   | Code                                                                                                                                                    | Time window (before index)                          |
|--------------------------------------------|---------------------------------------------------------------------------------------------------------------------------------------------------------|-----------------------------------------------------|
| <b>Exposures</b>                           |                                                                                                                                                         |                                                     |
| Citalopram                                 | ATC: N06AB04                                                                                                                                            | Index date                                          |
| Escitalopram                               | ATC: N06AB10                                                                                                                                            | Index date                                          |
| <b>Comparators</b>                         |                                                                                                                                                         |                                                     |
| Other SSRIs                                | ATC: N06AB03, N06AB08, N06AB05, N06AB06                                                                                                                 | Index date                                          |
| <b>Outcomes</b>                            |                                                                                                                                                         |                                                     |
| Serious arrhythmia                         | ICD-10: I47.2 (Ventricular tachycardia), I49.0 (Ventricular fibrillation & flutter), I49.3 (Ventricular premature depolarization), I46 (Cardiac arrest) | 6 months follow-up with a 5 year event free washout |
| Serious arrhythmia, sensitivity            | ICD-10: I47.2 (Ventricular tachycardia), I49.0 (Ventricular fibrillation and flutter)                                                                   | 6 months follow-up with a 5 year event free washout |
| <b>Exclusion criteria</b>                  |                                                                                                                                                         |                                                     |
| HIV                                        | ICD-10: B21-B24                                                                                                                                         | Ever                                                |
| End-stage renal disease                    | ICD-10: Z21, Z49, N18.5                                                                                                                                 | Ever                                                |
| Liver disease                              | ICD-10: K70-K74, K76.2-K76.7                                                                                                                            | Ever                                                |
| Severe respiratory disease                 | ICD-10: E66.2, I27, J84, J96.1, J96.9, R09.2, Z99.1                                                                                                     | Ever                                                |
| Other end-stage illness                    | ICD-10: E40-E43, I70.2, R02, R40.2, R64                                                                                                                 | Ever                                                |
| Dementia and drugs to treat dementia       | ICD-10: F00-F03, G30, N06D                                                                                                                              | Ever                                                |
| Substance misuse and drugs to treat misuse | ICD-10: F11-F19, R78.1-R78.5, T40<br>ATC: N07BC                                                                                                         | Ever                                                |

|                                                                |                                                                                                           |                     |
|----------------------------------------------------------------|-----------------------------------------------------------------------------------------------------------|---------------------|
| Organ transplant                                               | NCSP: KAS, FQA, FQB, JJC, GDG, JLE                                                                        | Ever                |
| Congenital abnormalities/childhood conditions                  | ICD-10: E84, F71-F73, F78, F79, G51, G80, Q01-Q03, Q05, Q20-Q26, Q90                                      | Ever                |
| Comorbidities                                                  |                                                                                                           |                     |
| Cancer                                                         | ICD-10: C (excl. C44)                                                                                     | 5 years             |
| Serious neurologic disease                                     | ICD-10: G10-G14, G35-37, G71, G82                                                                         | 5 years             |
| Acute coronary syndrome                                        | ICD-10: I20.0, I21.0, I22.0                                                                               | 5 years             |
| Other ischemic heart disease                                   | ICD-10: I11 (excl. I11.0), I20 (excl. I20.0), I24, I25                                                    | 5 years             |
| Heart failure/cardiomyopathy                                   | ICD-10: I11.0, I13.0, I13.2, I42, I43, I50, J81                                                           | 5 years             |
| Valve disorders                                                | ICD-10: I34-I37                                                                                           | 5 years             |
| Cardiac surgery/invasive cardiac procedure                     | NCSP: F                                                                                                   | 5 years             |
| Thyroid disturbances                                           | ICD-10: E00-E06, O90.5<br>ATC: H03AA01, H03BB01, H03BB02, H03BA02                                         | 5 years<br>6 months |
| Cerebrovascular disease                                        | ICD-10: G45, G46, I60, I69                                                                                | 5 years             |
| Arterial disease                                               | ICD-10: I65, I70-I74, I77, K55.0, K55.1                                                                   | 5 years             |
| Arrhythmia and antiarrhythmic drugs (class I and III)          | ICD-10: I44, I45, I47 (excl. I47.2), I48, I49 (excl. I49.0, I49.3)<br>ATC: C01B                           | 5 years<br>6 months |
| Venous thromboembolism                                         | ICD-10: I26, I80 (excl. I80.0), I81                                                                       | 5 years             |
| Renal disease                                                  | ICD-10: I12, I13, N00-N08, N17-N19, N25, Z49, Z94.0, Z99.2                                                | 5 years             |
| Respiratory disease                                            | ICD-10: J40-J47, J60-J69, J70, J92, J96, J98.2, J98.3                                                     | 5 years             |
| Rheumatic disease                                              | ICD-10: M05-M09, M30-M34, M35.1, M35.3, M45                                                               | 5 years             |
| Psychiatric disease and antipsychotics                         | ICD-10: F20-F25, F28-F34, F38-F45, F48, F50-F55, F59-F66, F68-F73, F78-F84, F88-F95, F98-F99<br>ATC: N05A | 5 years<br>6 months |
| Alcohol-related diseases and drugs to treat alcohol misuse     | ICD-10: F10<br>ATC: N07BB, N07BC                                                                          | 5 years<br>6 months |
| Smoking-related diseases and drugs to treat smoking dependence | ICD-10: J40-J44, J47, C34<br>ATC: R03BA, R03AC, R03BB, R03CC                                              | 5 years<br>6 months |
| Obesity and drugs to treat obesity                             | ICD-10: E66<br>ATC: A08A                                                                                  | 5 years<br>6 months |
| Co-medications                                                 |                                                                                                           |                     |
| ACE inhibitors and angiotensin receptor blockers               | ATC: C09A, C09B, C09C, C09D                                                                               | 6 months            |
| Calcium channel blockers                                       | ATC: C08C, C08D                                                                                           | 6 months            |
| Loop diuretics                                                 | ATC: C03C, C03EB                                                                                          | 6 months            |
| Other diuretics                                                | ATC: C03A, C03B                                                                                           | 6 months            |
| Beta-blockers                                                  | ATC: C07                                                                                                  | 6 months            |
| Digoxin                                                        | ATC: C01AA05                                                                                              | 6 months            |
| Nitrates                                                       | ATC: C01DA                                                                                                | 6 months            |
| Platelet inhibitors                                            | ATC: B01AC                                                                                                | 6 months            |
| Anticoagulants                                                 | ATC: B01AA                                                                                                | 6 months            |
| Lipid-lowering drugs                                           | ATC: C10                                                                                                  | 6 months            |
| Oral antidiabetic drugs                                        | ATC: A10B                                                                                                 | 6 months            |
| Insulin                                                        | ATC: A10A                                                                                                 | 6 months            |
| Antidepressants                                                | ATC: N06A (excl. N06AB)                                                                                   | 6 months            |
| Anxiolytics                                                    | ATC: N05B, N05C                                                                                           | 6 months            |
| Corticosteroids, inhalants                                     | ATC: R03AK                                                                                                | 6 months            |
| Oral corticosteroids                                           | ATC: H02AB                                                                                                | 6 months            |
| Xantines                                                       | ATC: R03DA                                                                                                | 6 months            |
| NSAIDs                                                         | ATC: M01A                                                                                                 | 6 months            |
| Opioids                                                        | ATC: N02A                                                                                                 | 6 months            |
| Antiepileptic drugs                                            | ATC: N03                                                                                                  | 6 months            |
| Antiparkinsons drugs                                           | ATC: N04B                                                                                                 | 6 months            |
| Hormone replacement therapy                                    | ATC: G03CA03, G03CA04, G03CA535, G03CA57, G03FA, G03FB, G03HB01, G03XC01                                  | 6 months            |

ACE, angiotensin-converting enzyme; ATC, anatomic therapeutic chemical (2); HIV, human immunodeficiency virus; excl., excluding; ICD-10, International Classification of Diseases (3); NCSP, NOMESCO Classification of Surgical Procedures (4); NSAIDs, non-steroid anti-inflammatory drugs

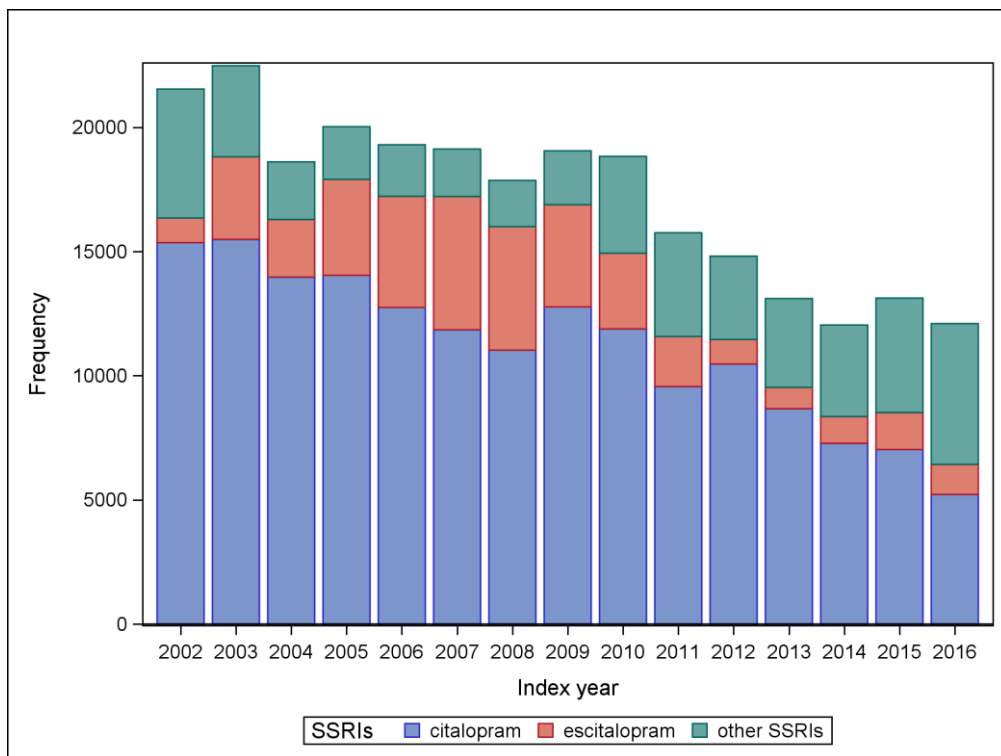

**Figure S3** Distribution of initiators of selective serotonin reuptake inhibitors and serotonin norepinephrine reuptake inhibitors during the study period from 2002 to 2016

**Table S3** Main and sensitivity analyses of the relative risk of serious arrhythmia with citalopram and escitalopram compared to other SSRIs. Sensitivity analyses using 1 and 6 months gap in the period after the EMA's recommendation and a final sensitivity analysis using ICD-10 I47.2 (ventricular tachycardia) and I49.0 (ventricular fibrillation and flutter) in the definition of serious arrhythmia. Estimates are provided both as crude, age and sex, and propensity score adjusted and matched.

| RR (95% CIs)              | Crude            | Age and sex adjusted | Propensity score adjusted | Propensity score matched |
|---------------------------|------------------|----------------------|---------------------------|--------------------------|
| Whole study period        |                  |                      |                           |                          |
| Citalopram                | 0.96 (0.69-1.34) | 0.90 (0.64-1.26)     | 0.87 (0.62-1.22)          | 1.13 (0.76-1.70)         |
| Escitalopram              | 0.87 (0.56-1.37) | 0.81 (0.51-1.28)     | 0.86 (0.53-1.40)          | 0.96 (0.52-1.72)         |
| Period before             |                  |                      |                           |                          |
| Citalopram                | 1.34 (0.84-2.15) | 1.26 (0.77-2.03)     | 1.18 (0.72-1.96)          | 1.52 (0.86-2.67)         |
| Escitalopram              | 1.19 (0.67-2.11) | 1.06 (0.59-1.90)     | 0.94 (0.51-1.72)          | 1.06 (0.55-2.06)         |
| Period after              |                  |                      |                           |                          |
| Citalopram                | 0.59 (0.35-1.00) | 0.55 (0.32-0.94)     | 0.54 (0.31-0.93)          | 0.83 (0.46-1.48)         |
| Escitalopram              | 0.57 (0.20-1.62) | 0.55 (0.19-1.59)     | 0.58 (0.20-1.63)          | 0.67 (0.19-2.36)         |
| Period after, 1 month gap |                  |                      |                           |                          |

|                              |                  |                  |                  |                  |
|------------------------------|------------------|------------------|------------------|------------------|
| Citalopram                   | 0.57 (0.34-0.98) | 0.53 (0.31-0.91) | 0.52 (0.30-0.90) | 0.79 (0.44-1.42) |
| Escitalopram                 | 0.57 (0.20-1.64) | 0.56 (0.20-1.60) | 0.57 (0.20-1.60) | 0.67 (0.19-2.36) |
| Period after, 6 months gap   |                  |                  |                  |                  |
| Citalopram                   | 0.57 (0.33-0.98) | 0.53 (0.31-0.91) | 0.51 (0.29-0.90) | 0.77 (0.43-1.40) |
| Escitalopram                 | 0.58 (0.20-1.68) | 0.57 (0.20-1.64) | 0.58 (0.20-1.64) | 0.68 (0.19-2.40) |
| Change in outcome definition |                  |                  |                  |                  |
| Citalopram                   | 1.17 (0.56-2.43) | 1.14 (0.55-2.38) | 1.05 (0.51-2.14) | 1.04 (0.70-1.56) |
| Escitalopram                 | 0.84 (0.30-2.35) | 0.85 (0.30-2.42) | NA               | 0.83 (0.46-1.51) |

## References

1. Schneeweiss S, Rassen JA, Brown JS, Rothman KJ, Happe L, Arlett P, et al. Graphical Depiction of Longitudinal Study Designs in Health Care Databases. *Ann Intern Med.* 2019 19;170(6):398–406.
2. WHOCC - ATC/DDD Index [Internet]. [cited 2020 Sep 22]. Available from: [https://www.whooc.no/atc\\_ddd\\_index/](https://www.whooc.no/atc_ddd_index/)
3. ICD-10 Version:2016 [Internet]. [cited 2022 Jan 5]. Available from: <https://icd.who.int/browse10/2016/en>
4. Nordic Medico-Statistical Committee. NOMESCO classification of surgical procedures. Copenhagen: Nordic Medico-Statistical Committee; 2010.
